# Supplementary material for: Diagnostic accuracy of magnetic resonance imaging techniques for treatment response evaluation in patients with head and neck tumors, a systematic review and meta-analysis
Source: PubMed Central journal article supplement (PMC5443521; doi:10.1371/journal.pone.0177986), 2017-05-24
Supplement: pone.0177986.s004.pdf [file pone.0177986.s004.pdf]

**SUPPLEMENTARY FIGURE 2 – Forest plots with diagnostic accuracy anatomical MRI and ADC for different scan times for the primary tumor site**

**A. Anatomical MRI primary site during treatment**

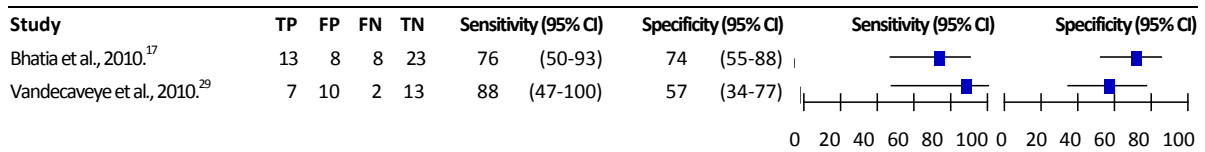

**B. Anatomical MRI primary site early posttreatment**

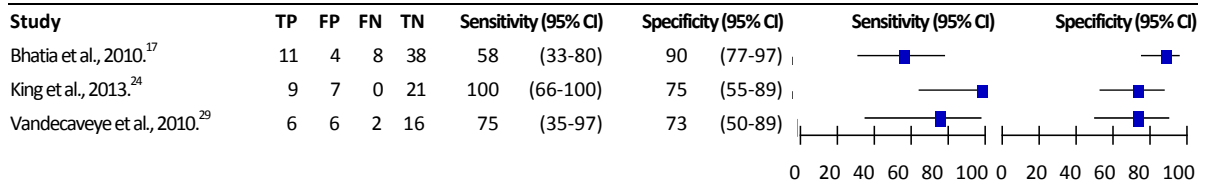

**C. Anatomical MRI primary site late posttreatment**

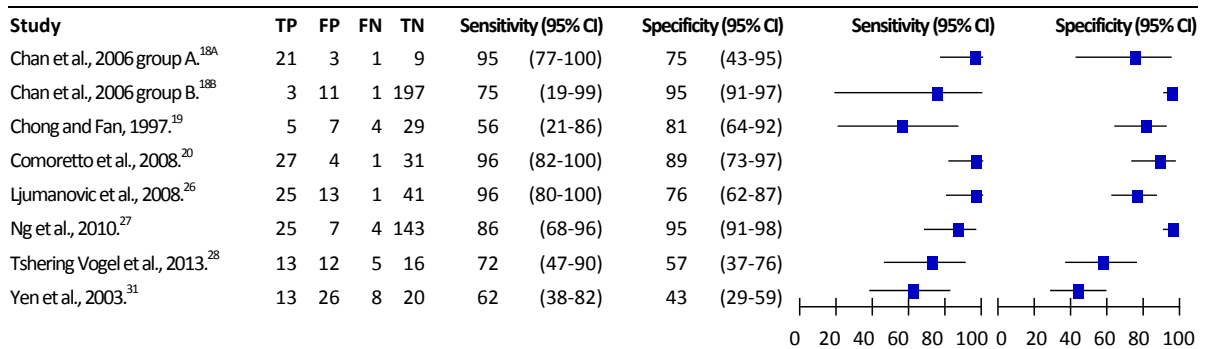

**D. ADC primary site during treatment**

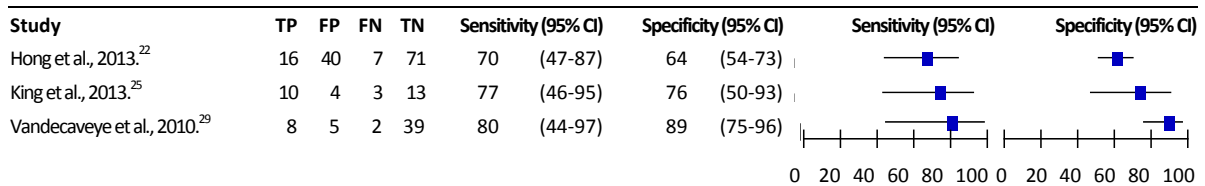

**E. ADC primary site early posttreatment**

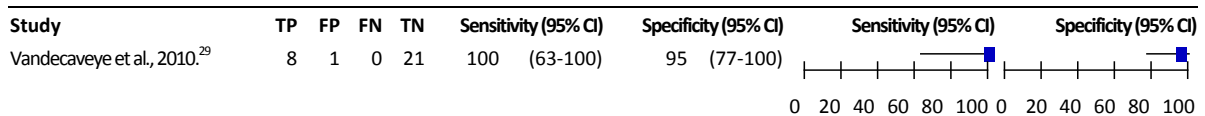

**F. ADC primary site late posttreatment**

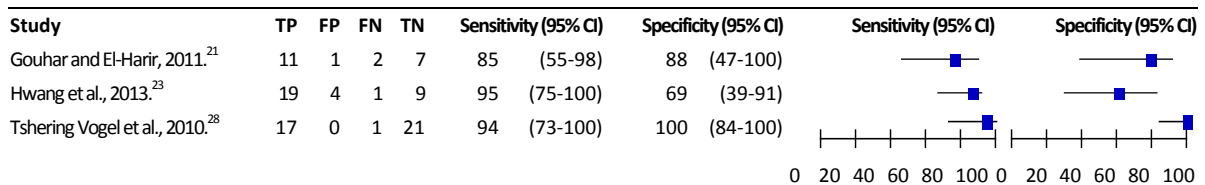

Diagnostic accuracy and the 2x2 table is displayed with true positives (TP), false positives (FP), false negatives (FN) and true negative (TN). Sensitivity and specificity with the 95% Confidence intervals (CI) are given.
